# Supplementary material for: MST4 inhibits human hepatocellular carcinoma cell proliferation and induces cell cycle arrest via suppression of PI3K/AKT pathway
Source: PubMed Central journal article supplement (PMC7378920; doi:10.7150/jca.45822), 2020-06-28
Supplement: jcav11p5106s1.pdf [file jcav11p5106s1.pdf]

**Table S1. Expression of MST4 in 105 Hepatocellular carcinoma (HCC) tissues and paired adjacent noncancer liver tissues (NT)**

| Variables | <i>n</i> | MST4 expression     |                      | $\chi^2$ | <i>P</i> |
|-----------|----------|---------------------|----------------------|----------|----------|
|           |          | Low ( <i>n</i> , %) | High ( <i>n</i> , %) |          |          |
| NT        | 105      | 3 (2.9)             | 102 (97.1)           | 85.05    | <0.0001  |
| HCC       | 105      | 67 (63.8)           | 38 (36.2)            |          |          |
